# Supplementary material
Source: PubMed Central journal article supplement (PMC5823606)
Supplement: NIHMS943063-supplement-SI.pdf [file NIHMS943063-supplement-SI.pdf]

## **SUPPLEMENTARY INFORMATION**

### **Evolution of a split RNA polymerase as a versatile biosensor platform**

**Jinyue Pu, Julia Zinkus-Boltz, Bryan C. Dickinson**

Department of Chemistry, The University of Chicago, Chicago, Illinois, USA

Email: Dickinson@UChicago.edu

## SUPPLEMENTARY RESULTS

| Vector name | Antibiotic resistance | Origin  | Purpose                                                                                     | Map |
|-------------|-----------------------|---------|---------------------------------------------------------------------------------------------|-----|
| p2-22       | carb/amp              | SC101   | P <sub>T7</sub> luciferase reporter plasmid                                                 | a   |
| pJin129     | spec                  | P15a    | Split N-terminal T7 RNAP expression plasmid                                                 | b   |
| p3-7        | spec                  | P15a    | Split N-terminal T7 RNAP-linker-ZA expression plasmid                                       | b   |
| p2-55       | chl <sub>r</sub>      | CloDF13 | Split C-terminal T7 RNAP expression plasmid                                                 | c   |
| p2-39       | chl <sub>r</sub>      | CloDF13 | ZB-linker-split C-terminal T7 RNAP expression plasmid                                       | c   |
| p2-57       | chl <sub>r</sub>      | CloDF13 | ZBneg-linker-split C-terminal T7 RNAP expression plasmid                                    | c   |
| p5-71       | spec                  | P15a    | N-29-1 split N-terminal T7 RNAP variant-linker-ZA expression plasmid                        | b   |
| p5-72       | spec                  | P15a    | N-29-8 split N-terminal T7 RNAP variant-linker-ZA expression plasmid                        | b   |
| p5-74       | spec                  | P15a    | N-29-1 split N-terminal T7 RNAP variant-linker-ZA (L13I, L20I) expression plasmid           | b   |
| p5-75       | spec                  | P15a    | N-29-8 split N-terminal T7 RNAP variant-linker-ZA (L13I, L20I) expression plasmid           | b   |
| p5-79       | spec                  | P15a    | N-29-1 split N-terminal T7 RNAP variant-GGSGSGSS-FRB expression plasmid                     | b   |
| p6-27       | spec                  | P15a    | N-29-1 split N-terminal T7 RNAP variant-GGSGSGSS-iLID expression plasmid                    | b   |
| p6-29       | chl <sub>r</sub>      | CloDF13 | SspB Nano-linker-Split C-terminal T7 RNAP expression plasmid                                | c   |
| p5-39       | chl <sub>r</sub>      | CloDF13 | FKBP-TSGGSG-Split C-terminal T7 RNAP expression plasmid                                     | c   |
| p5-40       | chl <sub>r</sub>      | CloDF13 | FKBP-GG-Split C-terminal T7 RNAP expression plasmid                                         | c   |
| p7-68       | chl <sub>r</sub>      | CloDF13 | FKBP-TSGGSGTSGGSG-Split C-terminal T7 RNAP expression plasmid                               | c   |
| p5-70       | spec                  | P15a    | N-29-1 split N-terminal T7 RNAP variant-GG-FRB expression plasmid                           | b   |
| p7-69       | spec                  | P15a    | N-29-1 split N-terminal T7 RNAP variant-GGSGSSGGSGSGSS-FRB expression plasmid               | b   |
| pJin200     | spec                  | P15a    | N-29-1 split N-terminal T7 RNAP variant-linker-ZA(L13I, L20I)-linker-FRB expression plasmid | b   |
| p3-13       | chl <sub>r</sub>      | CloDF13 | ZB-linker-split C-terminal CGG RNAP expression plasmid                                      | c   |
| p4-32       | chl <sub>r</sub>      | CloDF13 | ZBneg-linker-split C-terminal CGG RNAP expression plasmid                                   | c   |
| p2-64       | carb/amp              | SC101   | P <sub>CGG</sub> luciferase reporter plasmid                                                | a   |
| pJin216     | carb/amp              | SC101   | P <sub>T7</sub> luciferase, P <sub>CGG</sub> DsRed-Express2, reporter plasmid               | d   |
| pJin207     | chl <sub>r</sub>      | CloDF13 | ZB-C-terminal CGG/FKBP-C-terminal T7 expression plasmid                                     | e   |
| pJin208     | chl <sub>r</sub>      | CloDF13 | ZBneg-C-terminal CGG/FKBP-C-terminal T7 expression plasmid                                  | e   |
| pJin141     | kan                   | pBR322  | rapa-T7-F30-2xdBroccoli                                                                     | f   |
| p6-8        | kan                   | pBR322  | rapa-T7- mRNA(GFP)                                                                          | f   |
| pJin140     | kan                   | pBR322  | rapa-T7-shRNA(GFP)                                                                          | f   |
| p1-53       | carb/amp              | CloE1   | eGFP expression vector                                                                      | g   |
| p3-62       | kan                   | pUC     | mRFP expression vector                                                                      | h   |
| p8-61       | chl <sub>r</sub>      | CloDF13 | FKBP-linker-split C-terminal mEGFP (158+) expression plasmid                                | c   |
| p8-62       | spec                  | P15a    | split N-terminal mEGFP (1-157)-linker-FRB expression plasmid                                | b   |
| pJin210     | chl <sub>r</sub>      | CloDF13 | FKBP-linker-split C-terminal scEGFP (158+) expression plasmid                               | c   |
| pJin211     | spec                  | P15a    | split N-terminal scGFP (1-157)-linker-FRB expression plasmid                                | b   |

**Supplementary Table 1: List of all non-PACE constructs used in this work.** Vector maps for each construct type shown in **Supplementary Fig. 1**.

| evolutionary date | positive AP |     |        |      |      | negative AP |     |        |      |      |
|-------------------|-------------|-----|--------|------|------|-------------|-----|--------|------|------|
|                   | Vector name | Map | Origin | RBS1 | RBS2 | Vector name | Map | Origin | RBS3 | RBS4 |
| day1              | pJin69      | g   | SC101  | SD8  | sd8  |             |     |        |      |      |
| day2              | pJin69      | g   | SC101  | SD8  | sd8  |             |     |        |      |      |
| day3              | pJin69      | g   | SC101  | SD8  | sd8  |             |     |        |      |      |
| day4              | pJin177     | h   | P15A   | SD8  | sd8  | pJin173     | i   | pBR322 | SD4  | sd2  |
|                   | pJin177     | h   | P15A   | SD8  | sd8  | pJin173     | i   | pBR322 | SD4  | sd2  |
| day5              | pJin177     | h   | P15A   | SD8  | sd8  | pJin172     | i   | pBR322 | sd5  | sd6  |
| day6              | pJin177     | h   | P15A   | SD8  | sd8  | pJin172     | i   | pBR322 | sd5  | sd6  |
| day7              | pJin177     | h   | P15A   | SD8  | sd8  | pJin172     | i   | pBR322 | sd5  | sd6  |
| day8              | pJin177     | h   | P15A   | SD8  | sd8  | pJin104     | i   | pBR322 | SD8  | sd8  |
| day9              | pJin177     | h   | P15A   | SD8  | sd8  | pJin104     | i   | pBR322 | SD8  | sd8  |
|                   | pJin177     | h   | P15A   | SD8  | sd8  | pJin104     | i   | pBR322 | SD8  | sd8  |
| day10             | pJin182     | h   | P15A   | sd5  | sd5  | pJin172     | i   | pBR322 | sd5  | sd6  |
| day11             | pJin182     | h   | P15A   | sd5  | sd5  | pJin172     | i   | pBR322 | sd5  | sd6  |
| day12             | pJin182     | h   | P15A   | sd5  | sd5  | pJin172     | i   | pBR322 | sd5  | sd6  |
| day13             | pJin182     | h   | P15A   | sd5  | sd5  | pJin172     | i   | pBR322 | sd5  | sd6  |
| day14             | pJin185     | h   | P15A   | SD4  | sd8  | pJin194     | i   | pBR322 | SD8  | SD4  |
|                   | pJin185     | h   | P15A   | SD4  | sd8  | pJin194     | i   | pBR322 | SD8  | SD4  |
| day15             | pJin196     | h   | P15A   | SD4  | sd5  | pJin194     | i   | pBR322 | SD8  | SD4  |
| day16             | pJin196     | h   | P15A   | SD4  | sd5  | pJin194     | i   | pBR322 | SD8  | SD4  |
| day17             | pJin196     | h   | P15A   | SD4  | sd5  | pJin194     | i   | pBR322 | SD8  | SD4  |
| day18             | pJin196     | h   | P15A   | SD4  | sd5  | pJin194     | i   | pBR322 | SD8  | SD4  |
| day19             | pJin196     | h   | P15A   | SD4  | sd5  | pJin194     | i   | pBR322 | SD8  | SD4  |
| day20             | pJin70      | g   | SC101  | SD8  | sd8  | pJin104     | i   | pBR322 | SD8  | sd8  |
| day21             | pJin70      | g   | SC101  | SD8  | sd8  | pJin104     | i   | pBR322 | SD8  | sd8  |
| day22             | pJin178     | g   | SC101  | SD8  | sd6  | pJin172     | i   | pBR322 | sd5  | sd6  |
| day23             | pJin178     | g   | SC101  | SD8  | sd6  | pJin172     | i   | pBR322 | sd5  | sd6  |
| day24             | pJin178     | g   | SC101  | SD8  | sd6  | pJin172     | i   | pBR322 | sd5  | sd6  |
| day25             | pJin178     | g   | SC101  | SD8  | sd6  | pJin172     | i   | pBR322 | sd5  | sd6  |
| day26             | pJin178     | g   | SC101  | SD8  | sd6  | pJin172     | i   | pBR322 | sd5  | sd6  |
|                   | pJin178     | g   | SC101  | SD8  | sd6  | pJin172     | i   | pBR322 | sd5  | sd6  |
| day27             | pJin178     | g   | SC101  | SD8  | sd6  | pJin171     | i   | pBR322 | SD4  | sd8  |
|                   | pJin178     | g   | SC101  | SD8  | sd6  | pJin172     | i   | pBR322 | sd5  | sd6  |
| day28             | pJin178     | g   | SC101  | SD8  | sd6  | pJin171     | i   | pBR322 | SD4  | sd8  |
| day29             | pJin178     | g   | SC101  | SD8  | sd6  | pJin171     | i   | pBR322 | SD4  | sd8  |

**Supplementary Table 2: Full evolutionary protocol for PACE experiment to evolve proximity-dependent split RNAP.** Vector names and details are provided for each day of PACE. Vector maps for the posAP and negAP vectors are shown in **Supplementary Figure 1 i, j, and k**. Two sets of posAP/negAP vectors listed on the same day indicates that a mixed selection pressure was utilized, in which two types of host cells, each containing one set of the posAP/negAP plasmids were added to a lagoon simultaneously. The relative RBS strengths were obtained from previous studies<sup>50</sup>. Note: pJin69 utilized T7 C-term RNAP and P<sub>T7</sub>, unlike the rest of the positive APs, which used CGG C-term RNAP and P<sub>CGG</sub>.

|               |      |      |      |      |      |      |       |                  |       |             |
|---------------|------|------|------|------|------|------|-------|------------------|-------|-------------|
| <b>day 3</b>  |      |      |      |      |      |      |       |                  |       |             |
| N-3-1         |      |      |      |      |      |      |       |                  |       |             |
| N-3-2         |      |      |      |      |      |      |       |                  |       |             |
| N-3-3         |      |      |      |      |      |      |       |                  |       |             |
| N-3-4         |      |      |      |      | D87N |      |       | S128N            |       |             |
| N-3-5         | D26Y |      |      |      |      |      | I109N |                  |       |             |
| N-3-6         |      |      |      |      |      |      |       |                  |       |             |
| N-3-7         |      |      |      |      |      |      |       |                  |       |             |
| N-3-8         |      |      |      |      |      |      |       |                  |       |             |
| <b>day 7</b>  |      |      |      |      |      |      |       |                  |       |             |
| N-7-1         |      | L32S |      |      | E63K |      |       | K98R Q107K       |       |             |
| N-7-2         |      | L32S |      |      | E63K |      |       | K98R Q107K       |       |             |
| N-7-3         |      | L32S |      |      |      |      |       | K98R Q107K I109T |       |             |
| N-7-4         |      |      |      |      | E63K |      |       | K98R Q107K       |       |             |
| N-7-5         |      |      |      |      | E63K |      |       | K98R Q107K       |       |             |
| N-7-6         |      | L32S |      |      |      |      | E91G  | K98R Q107K       |       |             |
| N-7-7         |      | L32S |      |      | E63K |      |       | K98R Q107K       |       |             |
| N-7-8         | E25D | L32S |      |      |      |      | E91G  | K98R Q107K       |       |             |
| <b>day 8</b>  |      |      |      |      |      |      |       |                  |       |             |
| N-8-1         |      | L32S |      |      |      |      | E91G  | K98R Q107K       |       |             |
| N-8-2         |      | L32S |      |      | E63K |      |       | K98R Q107K       |       |             |
| N-8-3         |      |      |      |      | E63K |      |       | K98R Q107K       |       |             |
| N-8-4         |      | L32S |      |      |      |      |       | K98R Q107K I109T |       | G152D       |
| N-8-5         |      | L32S |      |      | E63K |      |       | K98R Q107K       |       |             |
| N-8-6         |      |      |      |      | E63K |      |       | K98R Q107K       |       |             |
| N-8-7         |      | L32S | E35D |      |      |      | E91G  | K98R Q107K       |       |             |
| N-8-8         |      | L32S |      |      | E63K |      |       | K98R Q107K       |       |             |
| <b>day 13</b> |      |      |      |      |      |      |       |                  |       |             |
| N-13-1        |      | L32S | E35G |      |      |      | E91G  | K98R Q107K       |       | A144T       |
| N-13-2        |      |      |      |      | E63K |      |       | K98R Q107K       |       |             |
| N-13-3        | D26G |      |      |      | E63K |      |       | K98R Q107K       |       | A144T A159S |
| N-13-4        |      | L32S | E35G |      |      |      | E91G  | K98R Q107K       |       |             |
| N-13-5        |      | L32S | E35G |      |      |      | E91G  | K98R Q107K       |       |             |
| N-13-6        |      | L32S | E35G |      |      |      | E91G  | K98R Q107K       |       |             |
| <b>day 21</b> |      |      |      |      |      |      |       |                  |       |             |
| N-21-1        |      | L32S | E35G |      |      |      | E91G  | K98R Q107K       |       |             |
| N-21-2        |      | L32S | E35G |      |      |      | E91G  | K98R Q107K       |       | A149T       |
| N-21-3        |      | L32S | E35G |      |      |      | E91G  | K98R Q107K       |       |             |
| N-21-4        |      | L32S | E35G | A49S |      |      | E91G  | K98R Q107K       |       | A149T       |
| N-21-5        |      | L32S | E35G |      |      |      | E91G  | K98R             | A124S |             |
| N-21-6        |      | L32S | E35G |      |      |      | E91G  | K98R Q107K       |       |             |
| N-21-7        |      | L32S | E35G |      | A83T |      | E91G  | K98R Q107K       |       |             |
| N-21-8        |      | L32S | E35G |      | A83T |      | E91G  | K98R Q107K       |       |             |
| N-21-9        |      | L32S | E35G |      | A83T |      | E91G  | K98R Q107K       |       |             |
| N-21-10       |      | L32S | E35G |      | E63K | D87E |       | K98R Q107K T122S |       | A144T       |
| <b>day27</b>  |      |      |      |      |      |      |       |                  |       |             |
| N-27-2        |      | L32S | E35G |      |      |      | E91G  | K98R Q107K       | A124S |             |
| N-27-3        |      | L32S | E35G |      |      |      | E91G  | K98R Q107K       | A124S |             |
| N-27-4        |      | L32S | E35G |      |      |      | E91G  | K98R Q107K       | A124S |             |
| N-27-5        |      | L32S | E35G |      | E63K |      |       | K98R Q107K T122S |       | A144T       |
| N-27-6        |      | L32S | E35G |      | E63K |      |       | K98R Q107K T122S |       | A144T       |
| N-27-7        |      | L32S | E35G |      | E63K |      |       | Q107K T122S      |       | A144T       |
| N-27-8        |      | L32S | E35G |      | E63K | N86S |       | Q107K T122S      |       | A144T       |
| <b>day29</b>  |      |      |      |      |      |      |       |                  |       |             |
| N-29-1        |      | L32S | E35G |      |      |      |       | K98R Q107K T122S |       | A144T       |
| N-29-2        |      | L32S | E35G |      | E63K |      |       | K98R Q107K T122S | T127A | A136D A144T |
| N-29-3        |      | L32S | E35G |      |      |      |       | K98R Q107K T122S |       | A144T       |
| N-29-4        |      | L32S | E35G |      | E63K |      |       | K98R Q107K T122S |       | A144T       |
| N-29-5        |      | L32S | E35G |      | E63K |      |       | K98R Q107K T122S |       | A144T       |
| N-29-7        |      | L32S | E35G |      | E63K |      |       | K98R Q107K T122S |       | A144T       |
| N-29-8        |      | L32S | E35G |      | E63K |      |       | K98R Q107K T122S |       | A144T       |

**Supplementary Table 3: Mutational analysis of evolving split RNAP.** Single phage sequenced during the course of the PACE experiment and coding mutations are shown for a set of variants assayed at each time point. The final variants selected for further assay (N-29-1 and N-29-8) are highlighted yellow.

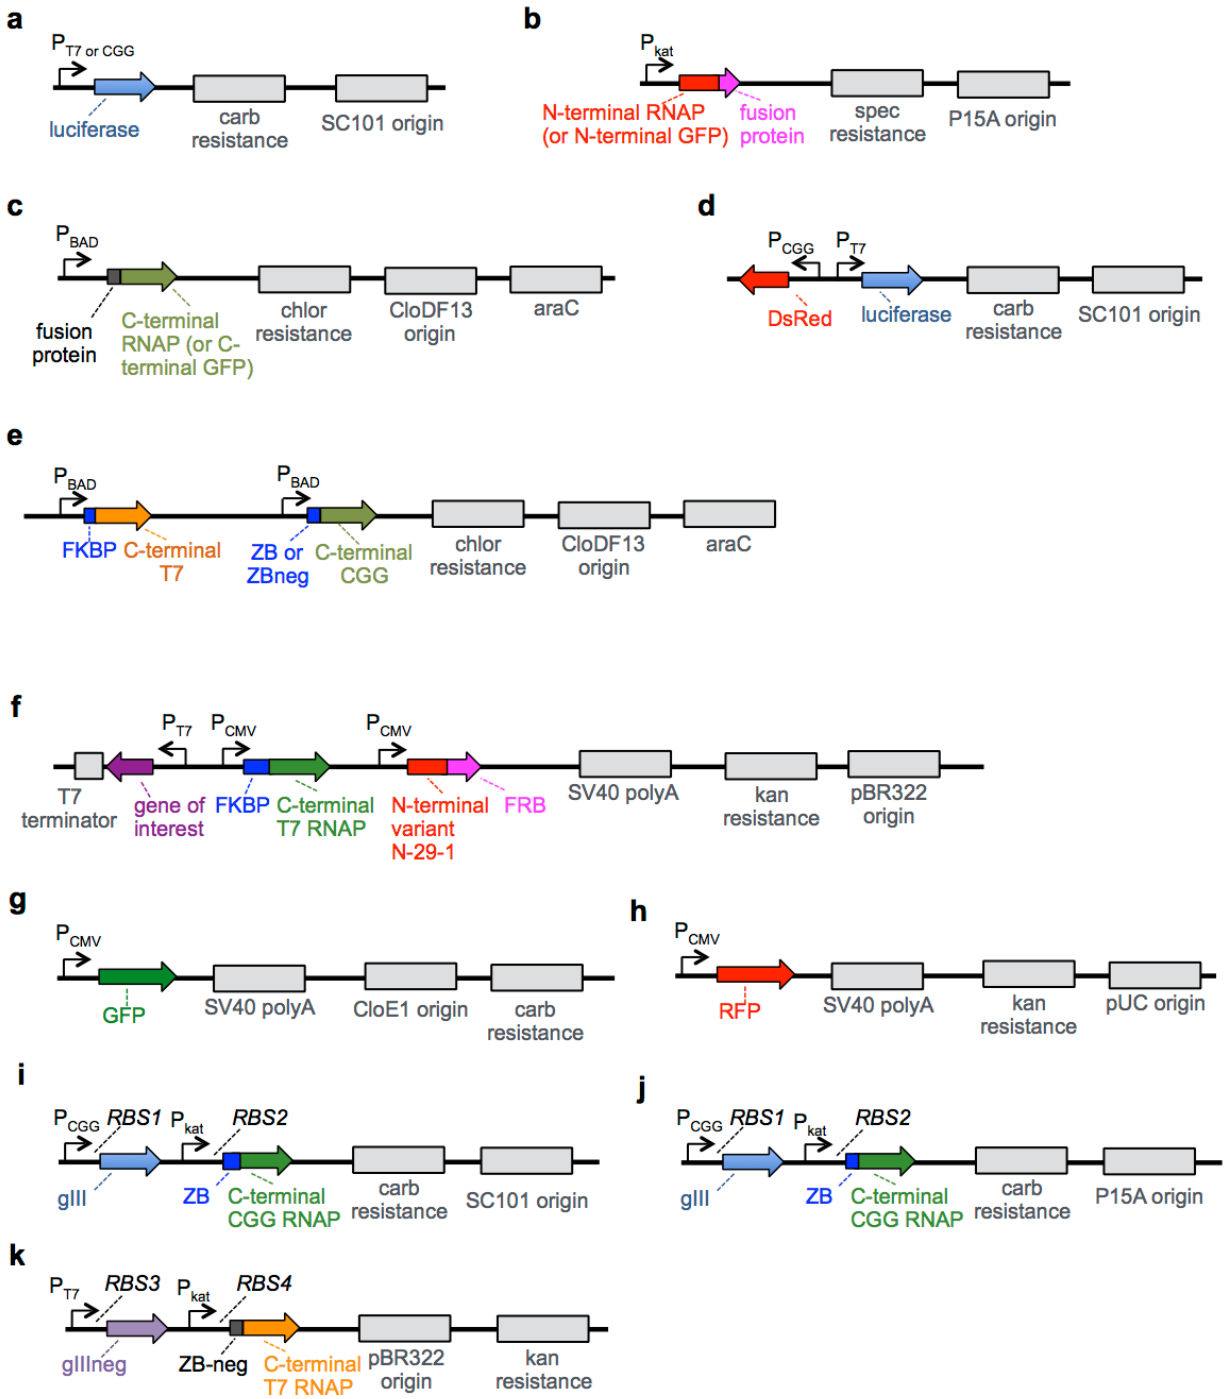

**Supplementary Figure 1: Vector maps for all constructs used in this work.** Vectors corresponding to the vectors utilized in this work outlined in **Supplementary Tables. 1 and 2.**

N-terminal short linker: N-29-1-**GG**-FRB  
 N-terminal medium linker: N-29-1-**GGSGSGSS**-FRB  
 N-terminal long linker: N-29-1-**GGSGSSGGSGSGSS**-FRB  
  
 C-terminal short linker: FKBP-**GG**-Cterminal  
 C-terminal medium linker: FKBP-**TSGGSG**-Cterminal  
 C-terminal long linker: FKBP-**TSGGSGTSGGSG**-Cterminal

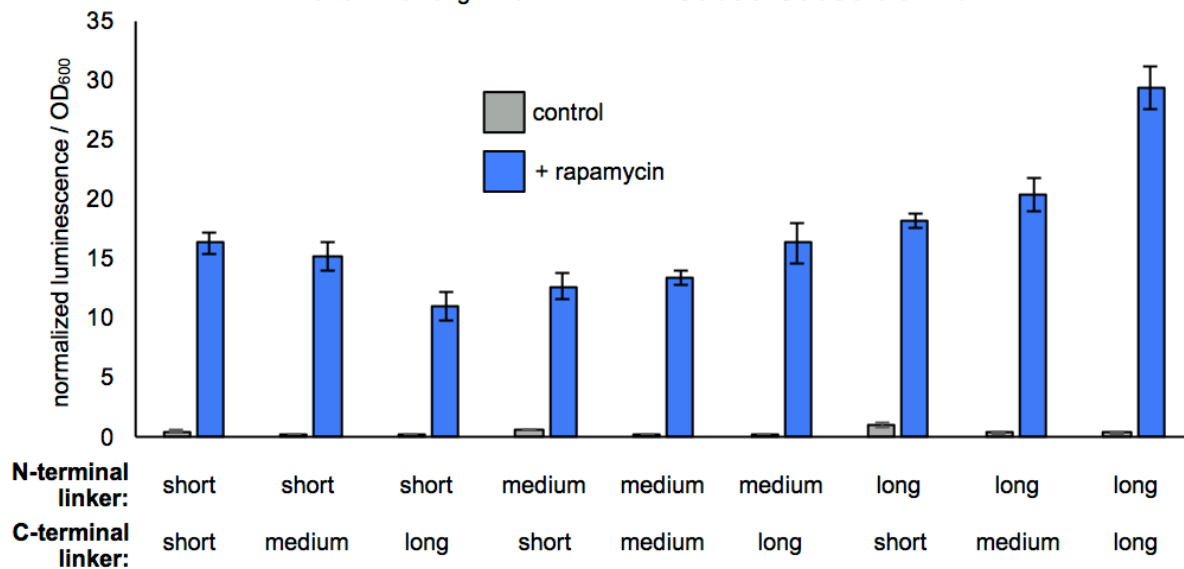

**Supplementary Figure 2: Linker effects of AR system.** Transcription response of the rapamycin-inducible RNAP system in *E. coli*. Cells transformed with expression vectors for the two halves of the small molecule-inducible RNAP and a reporter vector, then induced with either DMSO or 20  $\mu$ M rapamycin for 3 h prior to transcription analysis (error bars std. error, n = 5). The linkers tethering the binding domains to each half of the split RNAP were varied as indicated in the figure.

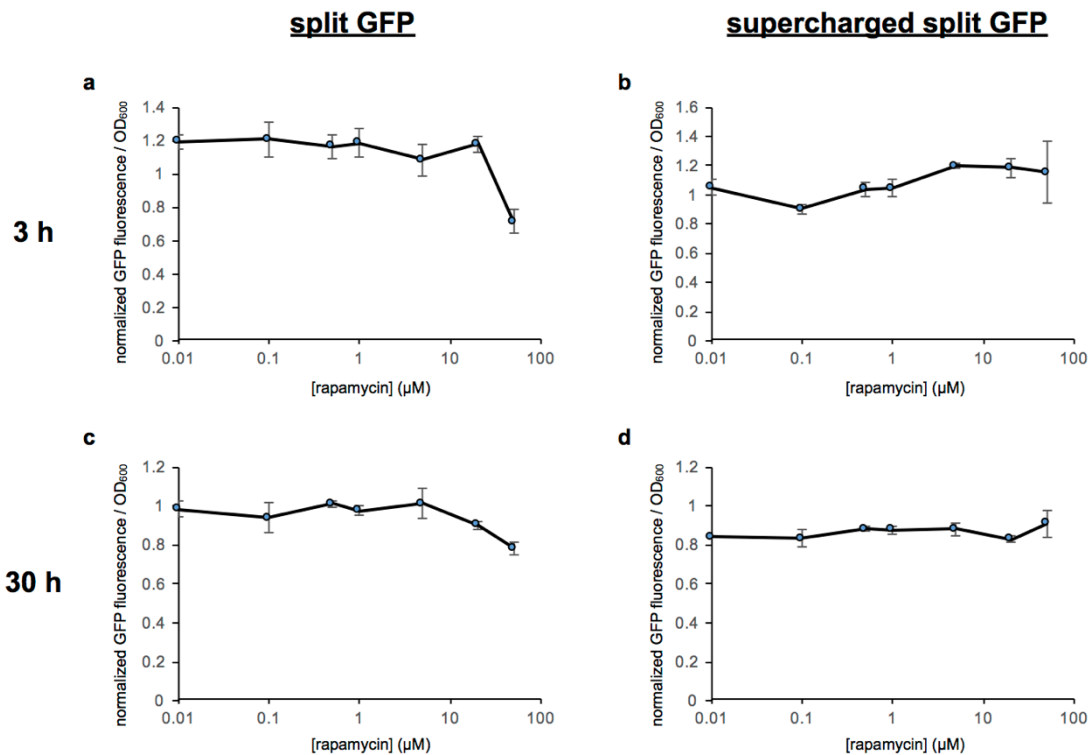

**Supplementary Figure 3: Comparison of ARs with split GFP under identical experimental conditions.** *E. coli* cells were transformed with expression vectors for the two halves of a split GFP system, either split GFP (a and c) or supercharged split GFP (b and d), fused to FRB and FKBP, in the same vector systems and conditions used for the AR fusions assayed in Fig. 3d. The cells were then induced with varying concentrations of rapamycin for either 3 h (a and b) or 30 h (c and d) prior to analysis of GFP fluorescence (error bars std. error, n = 5). No increase in signal is observed. This is possibly due to either the low concentrations of sensor available under these conditions and the corresponding enhanced sensitivity of the AR system, the signal-to-noise of GFP, the folding kinetics, or other properties of the split GFP system.

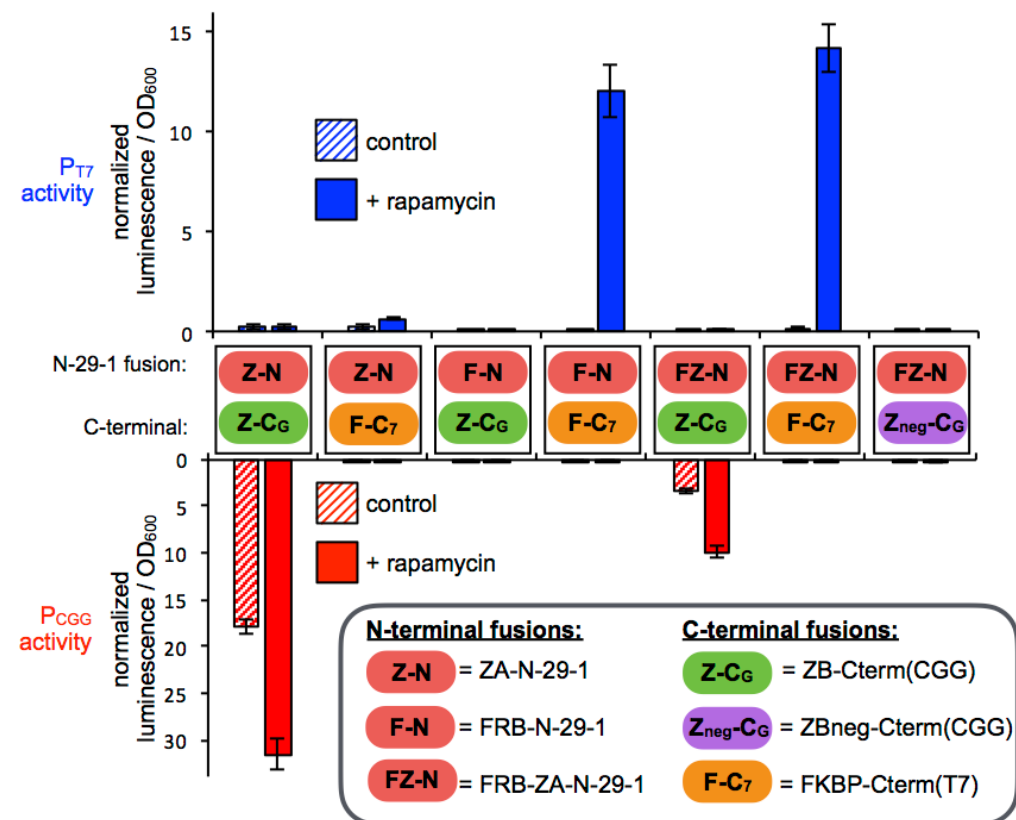

**Supplementary Figure 4: Validation of trimolecular interaction system.** Transcriptional response and selectivity in *E. coli* of bimolecular interactions of the synthetic parts shown in Fig. 4a. Cells transformed with expression vectors for N-29-1 fused to ZA (“Z-N”, p5-74), N-29-1 fused to FRB (“F-N”, p5-79), or N-29-1 fused to FRB and ZA (“FZ-N”, pJin200); either Z-C<sub>G</sub> (p3-13), Z<sub>neg</sub>-C<sub>G</sub> (p4-32), or F-C<sub>7</sub> (p5-39); and a reporter vector with either T7-(p2-22) or CGG-promoter (p2-64) driven luciferase. The cells were treated with either DMSO or 20  $\mu$ M rapamycin for 2 h prior to transcriptional analysis (error bars std. dev., n = 4). As predicted, the FZ-N-F-C<sub>7</sub> interaction is rapamycin-inducible and selectively drives transcription from the T7 promoter, while the FZ-N-Z-C<sub>G</sub> interaction is constitutive and selective for the CGG promoter.



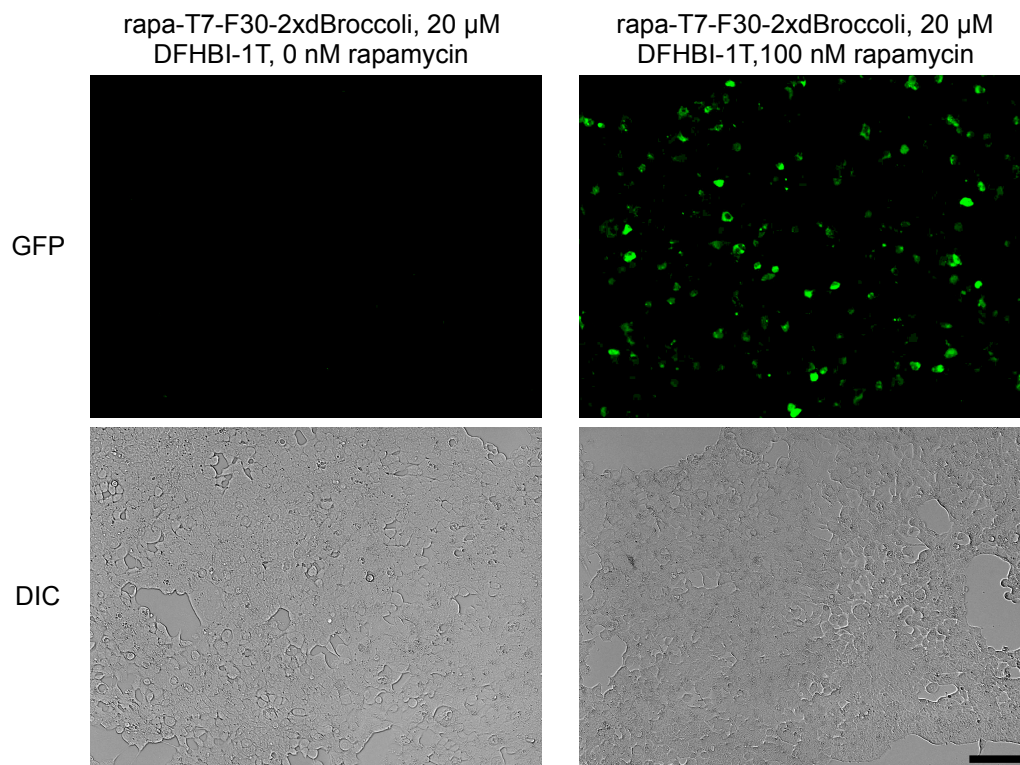

**Supplementary Figure 5: Fluorescence imaging of rapa-T7-F30-2xdBroccoli vector in HEK293T cells.** (Expanded data from **Fig. 5b**) HEK293T cells transfected with the rapa-T7-F30-2xdBroccoli vector induced with 0 or 100 nM rapamycin for 30 min in the presence of DFHBI-1T then analyzed by fluorescence microscopy. DIC and fluorescence images shown for each set of conditions and 100 μm scale bar shown.

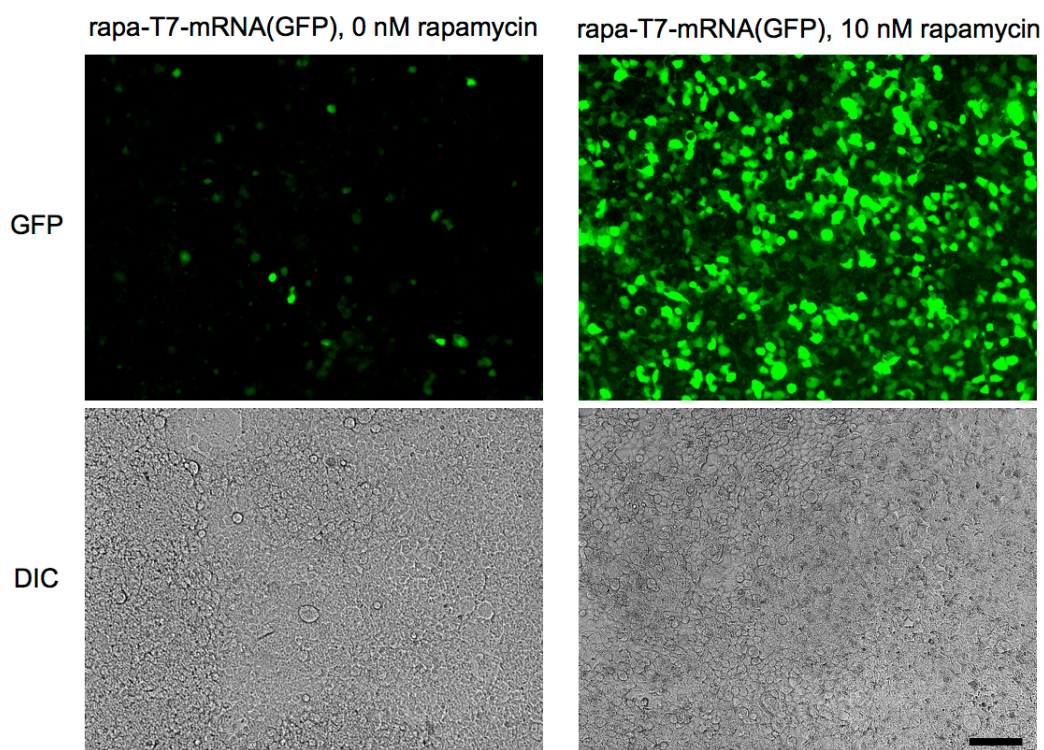

**Supplementary Figure 6: Fluorescence imaging of rapa-T7-mRNA(GFP) vector in HEK293T cells.** (Expanded data from **Fig. 5c**) HEK293T cells transfected with the rapa-T7-mRNA(GFP) vector induced with 0 or 10 nM rapamycin for 24 h and then analyzed by fluorescence microscopy. DIC and fluorescence images shown for each set of conditions and 100  $\mu\text{m}$  scale bar shown.
